# Supplementary material for: Predicting who fails to meet the physical activity guideline in pregnancy: a prospective study of objectively recorded physical activity in a population-based multi-ethnic cohort
Source: PubMed Central journal article supplement (PMC4962490; doi:10.1186/s12884-016-0985-x), 2016-07-26
Supplement: 12884_2016_985_MOESM2_ESM.pdf [file 12884_2016_985_MOESM2_ESM.pdf]

## Additional file 2: Predictor selection procedure for the prognostic model

### Step 1:

- Based on PA correlates identified in previous studies candidate predictors (Table, Column B) were selected and organized into domains (Table Column A).

### Step 2:

- Univariate logistic regression was performed, and only predictors with  $p < 0.2$  were retained (Table, Column C):
- In each domain the predictor with lowest  $P$ -value was coined “preferred” while the other predictor(s) were coined “alternative” (Table, Column C). If the association in univariate regression was non-significant ( $p \geq 0.2$ ), the cell in column C was left empty.
- All preferred predictors were entered in multiple logistic regression to assess multivariable significance.
- To determine if an alternative predictor yielded a lower  $P$ -value, the preferred predictor was replaced by the alternative predictor in one domain, while the preferred predictors in the other domains were retained
- The procedure was repeated for alternative predictors in all domains.

### Step 3:

- From each domain the candidate predictor with lowest  $P$ -value (as assessed by the repeated multiple logistic regression analyses in step 2) was entered in the full model. These were ethnicity, occupation, parity, body fat percentage, Self-reported PA, physically active friends and perceived preventive effect of PA.

### Step 4:

- We performed multiple logistic regression with backward elimination to determine which predictors to include in the final prognostic model. Only variables with  $P$ -value  $\leq 0.05$  were retained in the final model. The following four predictors remained significant and were included in the final prognostic model: ethnicity, parity, body fat percentage, and physically active friends.

### Step 5:

- As a sensitivity analysis, missing values for predictors included in the full model were imputed by chained equations to assess potential bias in complete case analyses. We analysed 20 replications [1]. The results of the full model yield similar results (data not shown).
- Details on missing values are presented in column D

Table

| <b>A</b>                                 | <b>B</b>                                                         | <b>C</b>                                 | <b>D</b>              |
|------------------------------------------|------------------------------------------------------------------|------------------------------------------|-----------------------|
| <b>Domains</b>                           | <b>Candidate predictors identified and available in data set</b> | <b>P&lt;0.2 in univariate regression</b> | <b>Missing values</b> |
| <b>Health</b>                            | Body fat percentage visit 1                                      | Preferred                                | No missing            |
|                                          | Health pre-pregnancy (Self-reported)                             | Alternative                              | 5                     |
|                                          | Pelvic girdle- /lumbopelvic pain                                 | Alternative                              | 9                     |
|                                          | Annual weight change 18yr – current pre-pregnant                 | Alternative                              | 16                    |
|                                          | Age                                                              |                                          | No missing            |
|                                          | Recent Psychological trauma                                      |                                          | 18                    |
|                                          | Lumbar pain (without pelvic pain)                                |                                          | 9                     |
| <b>Culture</b>                           | Ethnicity                                                        | Preferred                                | No missing            |
|                                          | Residency period in Norway                                       | Alternative                              | 1                     |
|                                          | Norwegian language skills                                        | Alternative                              | No missing            |
|                                          | Use of interpreter                                               |                                          | No missing            |
| <b>Socioeconomic position</b>            | Occupation                                                       | Preferred                                | 7                     |
|                                          | Education                                                        | Alternative                              | 2                     |
| <b>Pregnancy</b>                         | Parity                                                           | Preferred                                | No missing            |
|                                          | Planned pregnancy                                                | Alternative                              | 5                     |
|                                          | Pregnancy emesis                                                 |                                          | 11                    |
| <b>Lifestyle</b>                         | Self-reported PA                                                 | Preferred                                | 15                    |
|                                          | Sleep duration                                                   |                                          | 61                    |
|                                          | Smoking 3 months pre-pregnancy                                   |                                          | 3                     |
| <b>PA Psychosocial</b>                   | Physically active friends (descriptive norm)                     | Preferred                                | 20                    |
|                                          | PA injunctive norm                                               | Alternative                              | 30                    |
|                                          | PA self-efficacy                                                 | Alternative                              | 14                    |
|                                          | PA identity                                                      | Alternative                              | 21                    |
|                                          | PA perception of control                                         |                                          | 19                    |
|                                          | PA family support                                                |                                          | 16                    |
|                                          | PA peer support                                                  |                                          | 13                    |
|                                          | PA active neighbours                                             |                                          | 16                    |
| <b>Perceived preventive effect of PA</b> | Perceived preventive effect of PA                                | Preferred                                | 19                    |
| <b>Physical neighbourhood</b>            | Perception of physical activity opportunities                    |                                          | 18                    |
|                                          | Perception of walkability                                        |                                          | 18                    |
|                                          | Perception of access to local shops                              |                                          | 15                    |
|                                          | Perception of access to local parks                              |                                          | 19                    |
|                                          | Perception of access to local exercise facilities                |                                          | 31                    |

## Reference

1 White IR, Royston P, Wood AM. Multiple imputation using chained equations: Issues and guidance for practice. *Stat Med* 2011;30:377-99.
